# Supplementary material
Source: PubMed Central journal article supplement (PMC2752488)

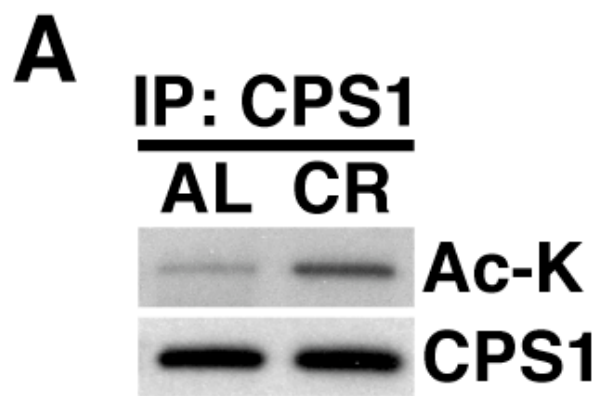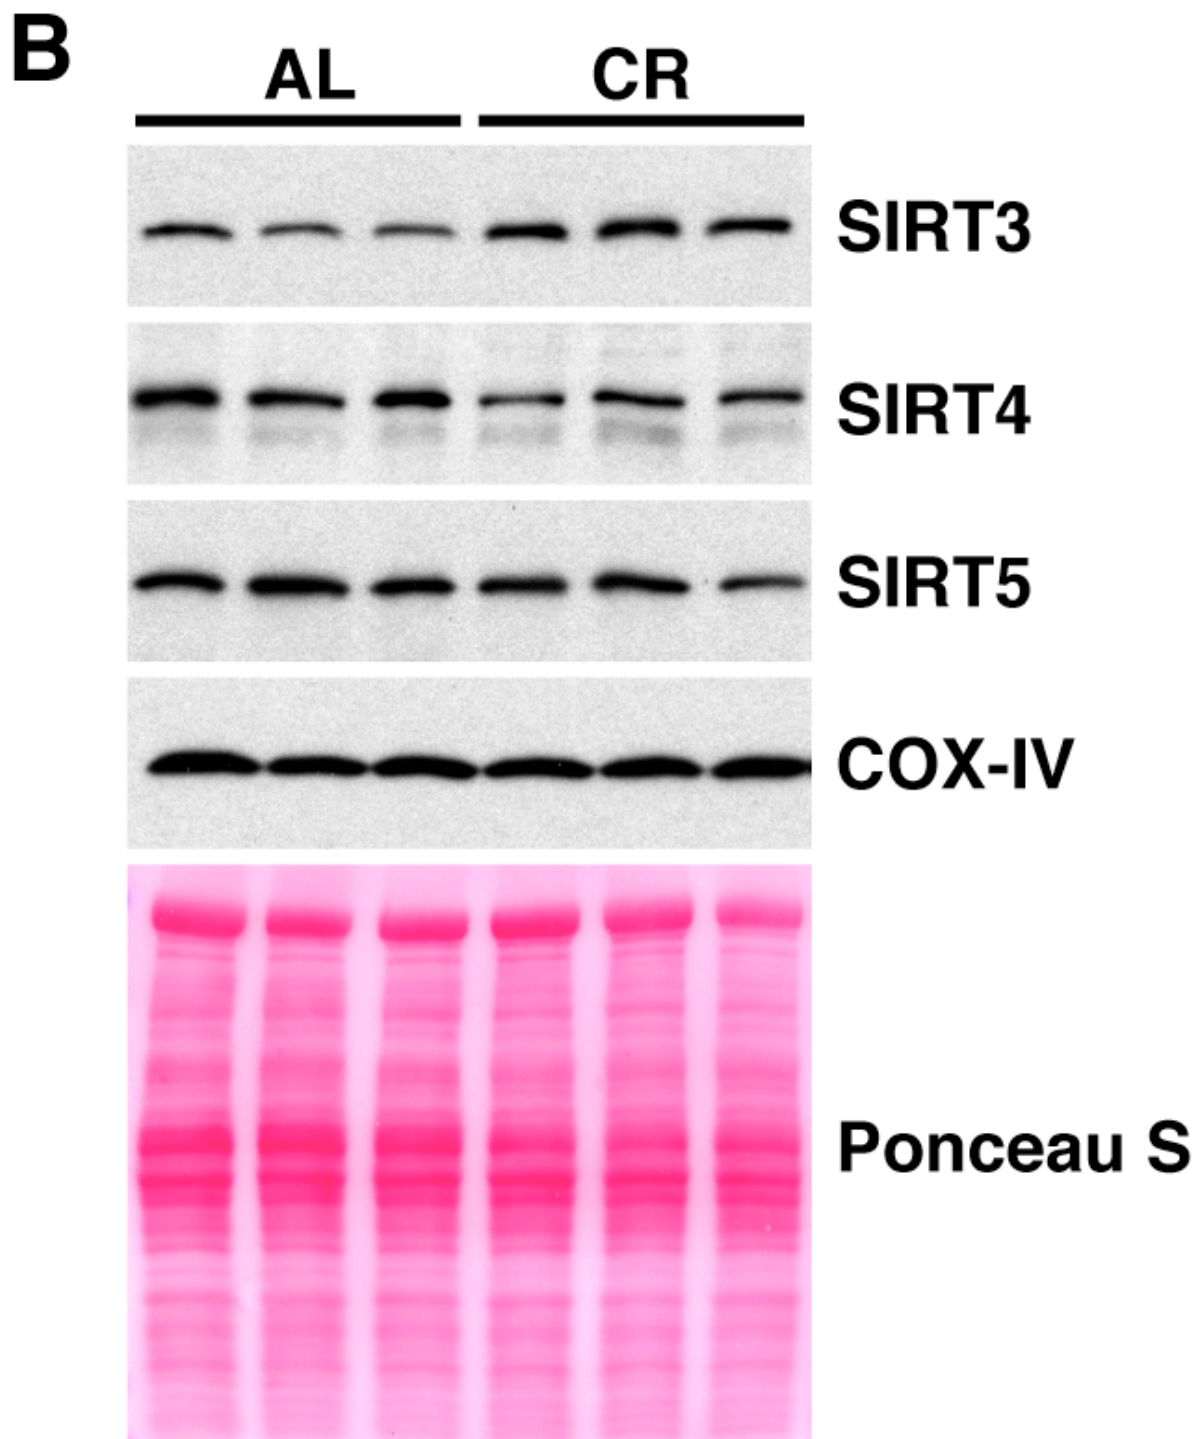

Supplement: NIHMS134497-supplement-Supp_Fig_01.pdf [file NIHMS134497-supplement-Supp_Fig_01.pdf]
